# Supplementary material for: Charge transport through dicarboxylic-acid-terminated alkanes bound to graphene–gold nanogap electrodes
Source: Royal Society of Chemistry journal article supplement (doi:10.1039/c6nr03807g), 2016-01-01
Supplement: c6nr03807g1.pdf [file c6nr03807g1.pdf]

## Charge transport through dicarboxylic-acid-terminated alkanes bound to graphene-gold nanogap electrodes

Longlong Liu,<sup>a,b</sup> Qian Zhang,<sup>a</sup> Shuhui Tao,<sup>a</sup> Cezhou Zhao,<sup>c</sup> Eman Almutib,<sup>d,e</sup> Qusiy Al-Galiby,<sup>d,e</sup> Steven W. D. Bailey,<sup>d</sup> Iain Grace,<sup>d</sup> Colin J. Lambert,<sup>d</sup> Jun Du<sup>\*,b</sup> Li Yang<sup>\*,a</sup>

<sup>a</sup> Department of Chemistry, Xi'an-Jiaotong Liverpool University, Suzhou, Jiangsu 215123, China. Email: li.yang@xjtlu.edu.cn

<sup>b</sup> Department of Chemistry and Chemical Engineering, Chongqing University, Chongqing 400044, China. Email: dujune@cqu.edu.cn

<sup>c</sup> Department of Electrical Electronic Engineering, Xi'an-Jiaotong Liverpool University, Suzhou, Jiangsu 215123, China.

<sup>d</sup> Department of Physics, Lancaster University, Lancaster LA1 4YB, UK.

<sup>e</sup> Department of Physics, Al-Qadisiyah University, Al-Qadisiyah, Iraq.

### The dependence of transport properties on molecular length of the dicarboxylic-acid-terminated alkane in a graphene-molecule-gold junction (Gr-Au):

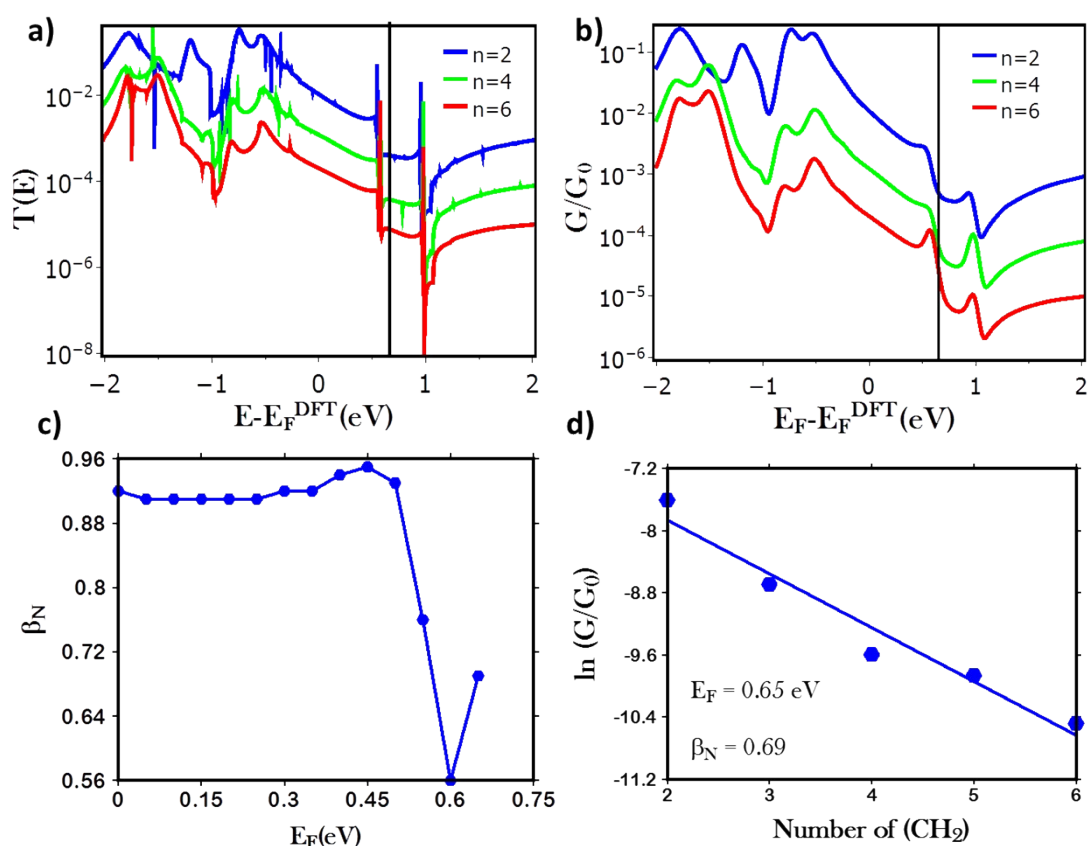

**Figure S1.** For the structures in Figure 5a-c, Figure S1 shows a) the transmission coefficients as a function of energy of the systems containing the dicarboxylic-acid-terminated alkane molecule with the

lengths  $n=2$ ,  $n=4$  and  $n=6$  of  $\text{CH}_2$  attached to the graphene-gold electrodes, b) demonstrates the room temperature electrical conductances over a range of Fermi energies, c) shows the room-temperature tunnelling factor  $\beta_N$  as a function of Fermi energy, and d) the logarithm of conductance versus the molecular length of the dicarboxylic-acid-terminated alkane.

**Table S1.** A comparison between the experimental measurements and DFT-CA calculations of the structures such as those shown in Figure 5.

| Molecules                               | Conductance( $G=I/V$ , nS)       |                    |
|-----------------------------------------|----------------------------------|--------------------|
|                                         | Theoretical value, $E_F=0.65$ eV | experimental value |
| $\text{HOOC}(\text{CH}_2)_2\text{COOH}$ | 38.5                             | 15.6               |
| $\text{HOOC}(\text{CH}_2)_4\text{COOH}$ | 5.3                              | 5.0                |
| $\text{HOOC}(\text{CH}_2)_6\text{COOH}$ | 2.2                              | 1.08               |

Table S1 shows the theoretical and experimental conductances of three graphene-molecule-Au junctions. The conductances decrease with increasing molecular length.

**Relaxed structures of dicarboxylic-acid-terminated alkanes placed between two gold electrodes (Au-Au):**

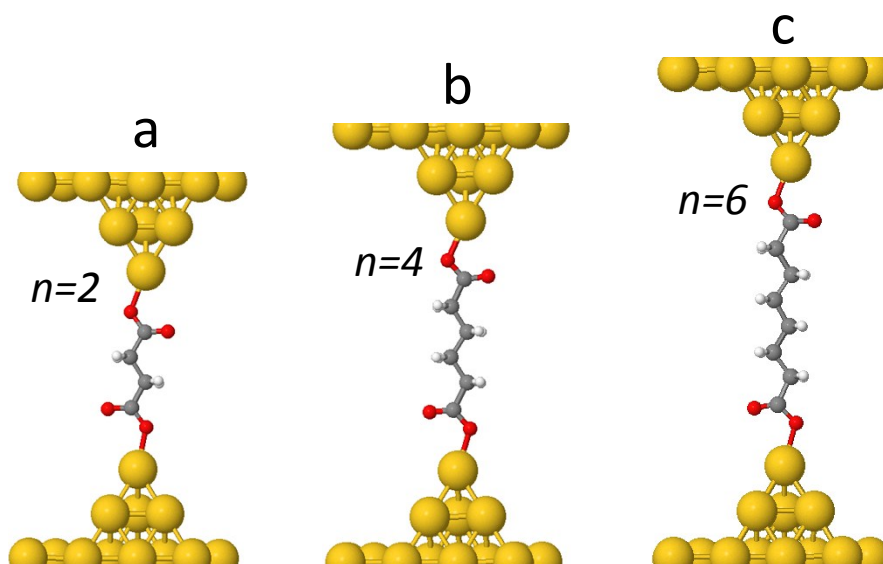

**Figure S2.** (a, b and c) show the optimized geometries of systems containing the dicarboxylic-acid-terminated alkanes of lengths ( $n=2$ , 4 and 6) connected to two gold electrodes.

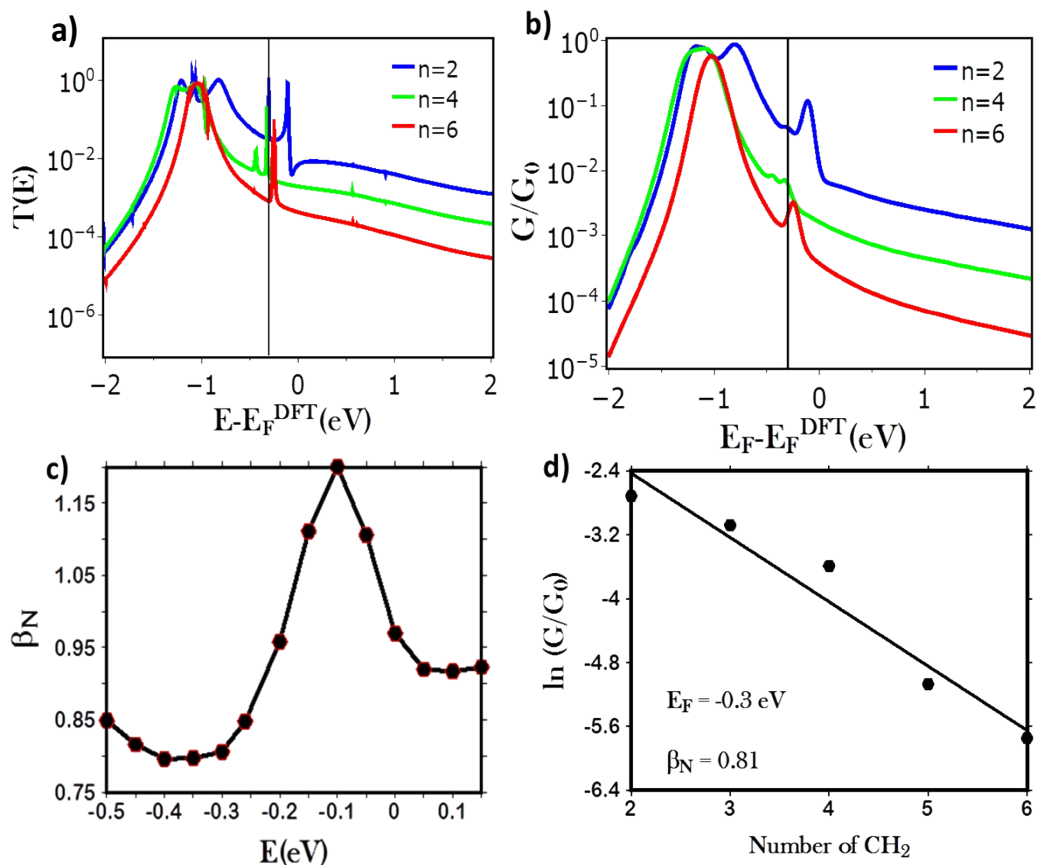

**Figure S3.** For the Au-molecule-Au structures in Figures S2a-c, Figure S3 shows a) the transmission coefficients as a function of energy b) the room temperature electrical conductances over a range of Fermi energies, c) the room-temperature attenuation factor  $\beta_N$  as a function of Fermi energy, and d) the logarithmic conductance versus the molecular length.

### Theoretical results for defective graphene

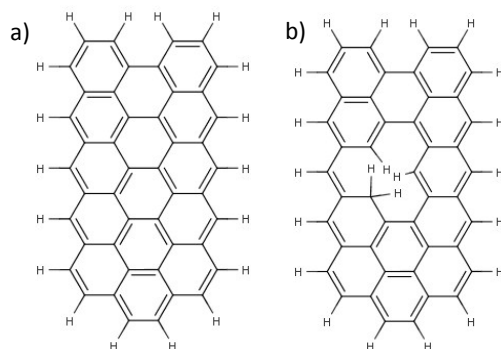

**Figure S4.** a) A perfect graphene sheet and b) a defected graphene sheet.

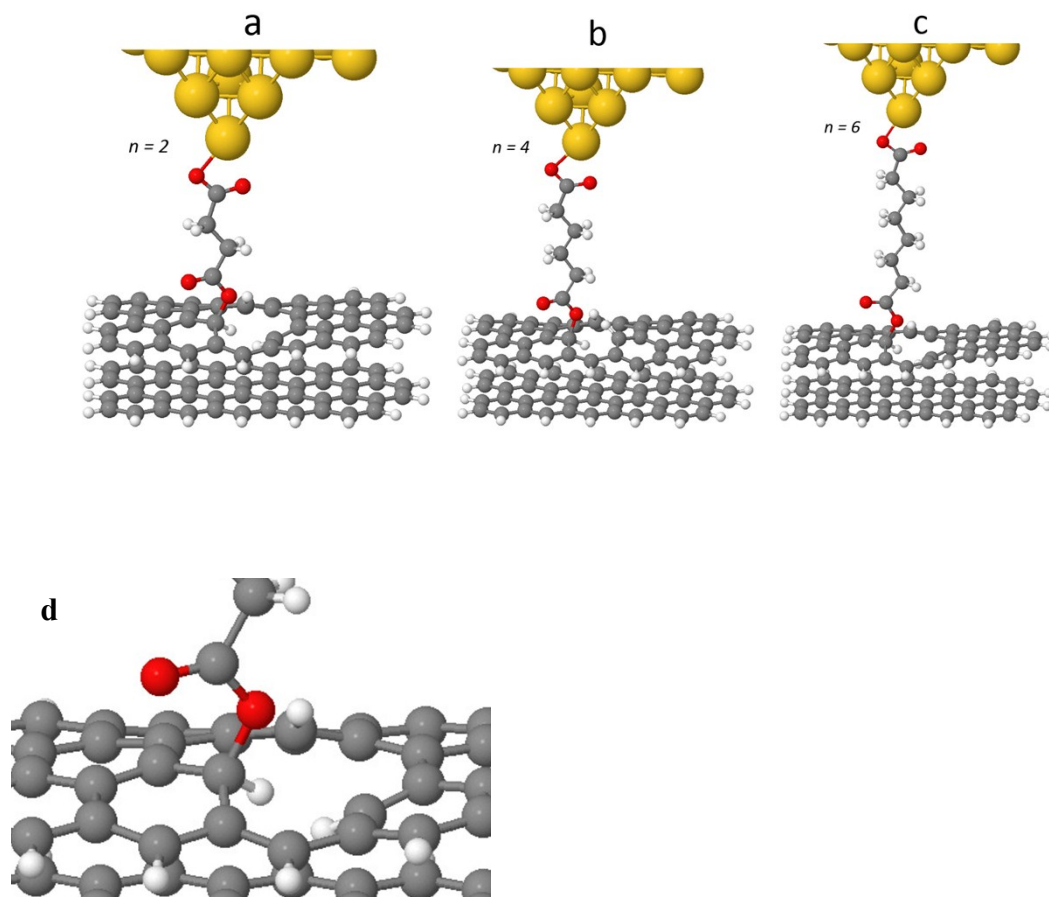

**Figure S5.** (a, b and c) show the optimized geometries of systems containing the dicarboxylic-acid-terminated alkanes of lengths ( $n=2$ , 4, and 6) connected to a defected graphene sheet. (d) Shows the detail of the defected graphene sheet.
